# Supplementary material for: Aerosol properties and aerosol–radiation interactions in clear sky conditions over Germany
Source: Copernicus journal article supplement (doi:10.5194/acp-2021-517), 2021-07-09

**Supplement Figure 1:**

This figure replaces Fig.2. The station labels and dots are now properly placed.

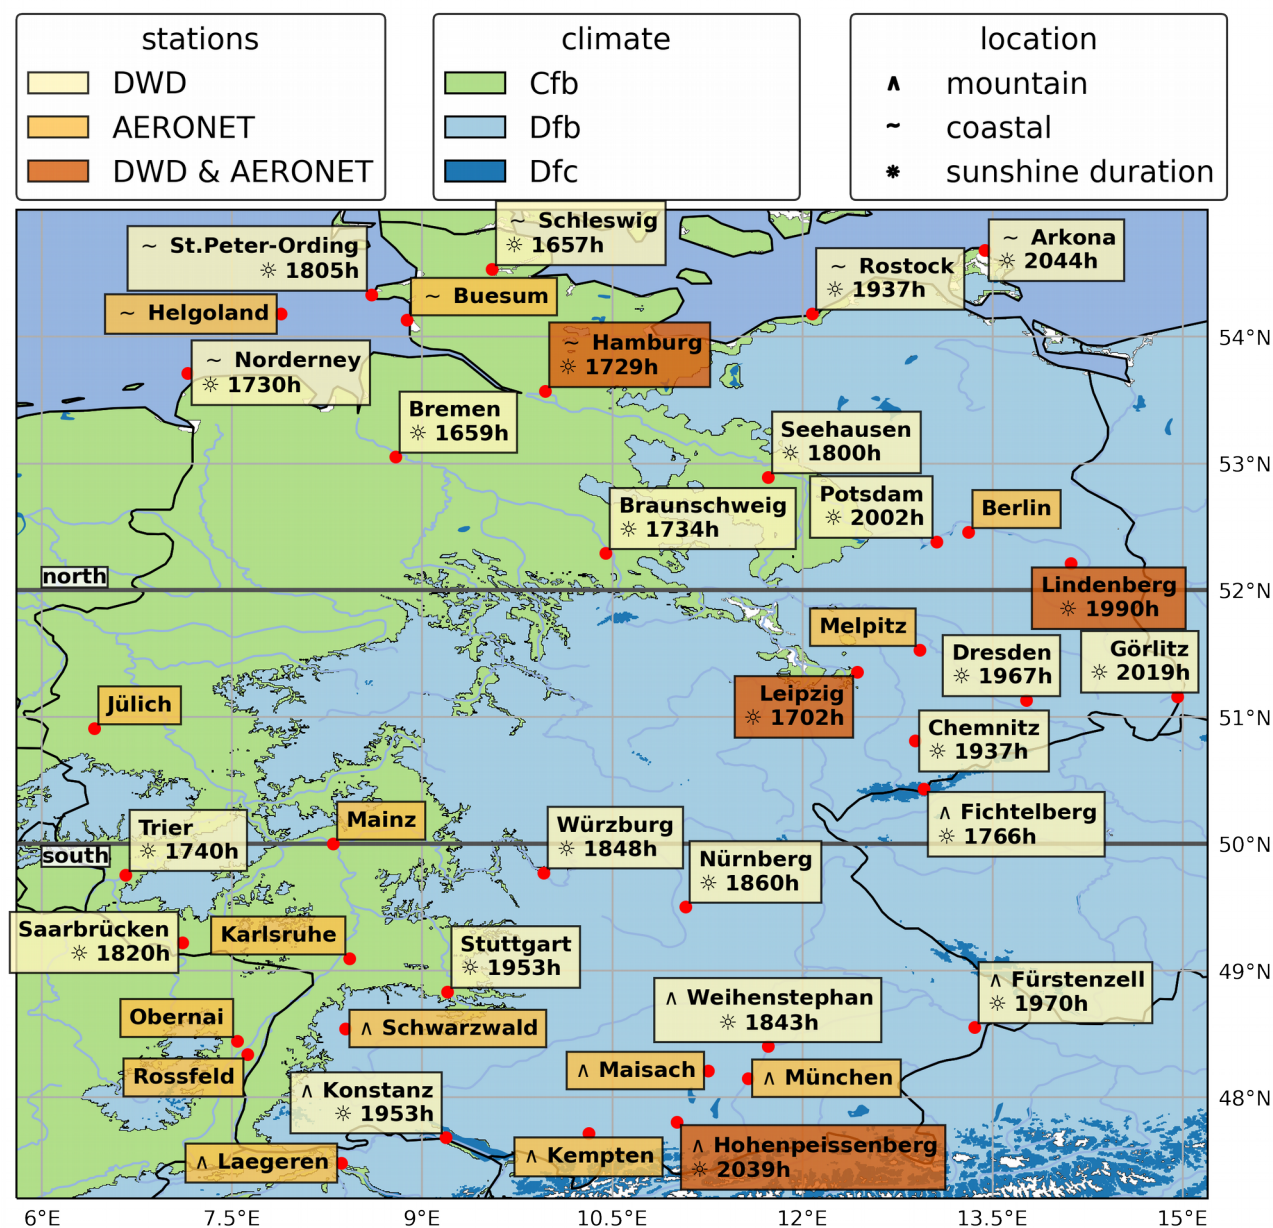

## Supplement Figure2:

This figure is the same as Fig 03 in the manuscript, except, cases of AERONET AE>1.6 are dropped for the comparison of SSA and ASY. Although the cases possibly influenced by the AE cut off by CAMS RA are about 40% of the total dataset, the influence on SSA and ASY is minor.

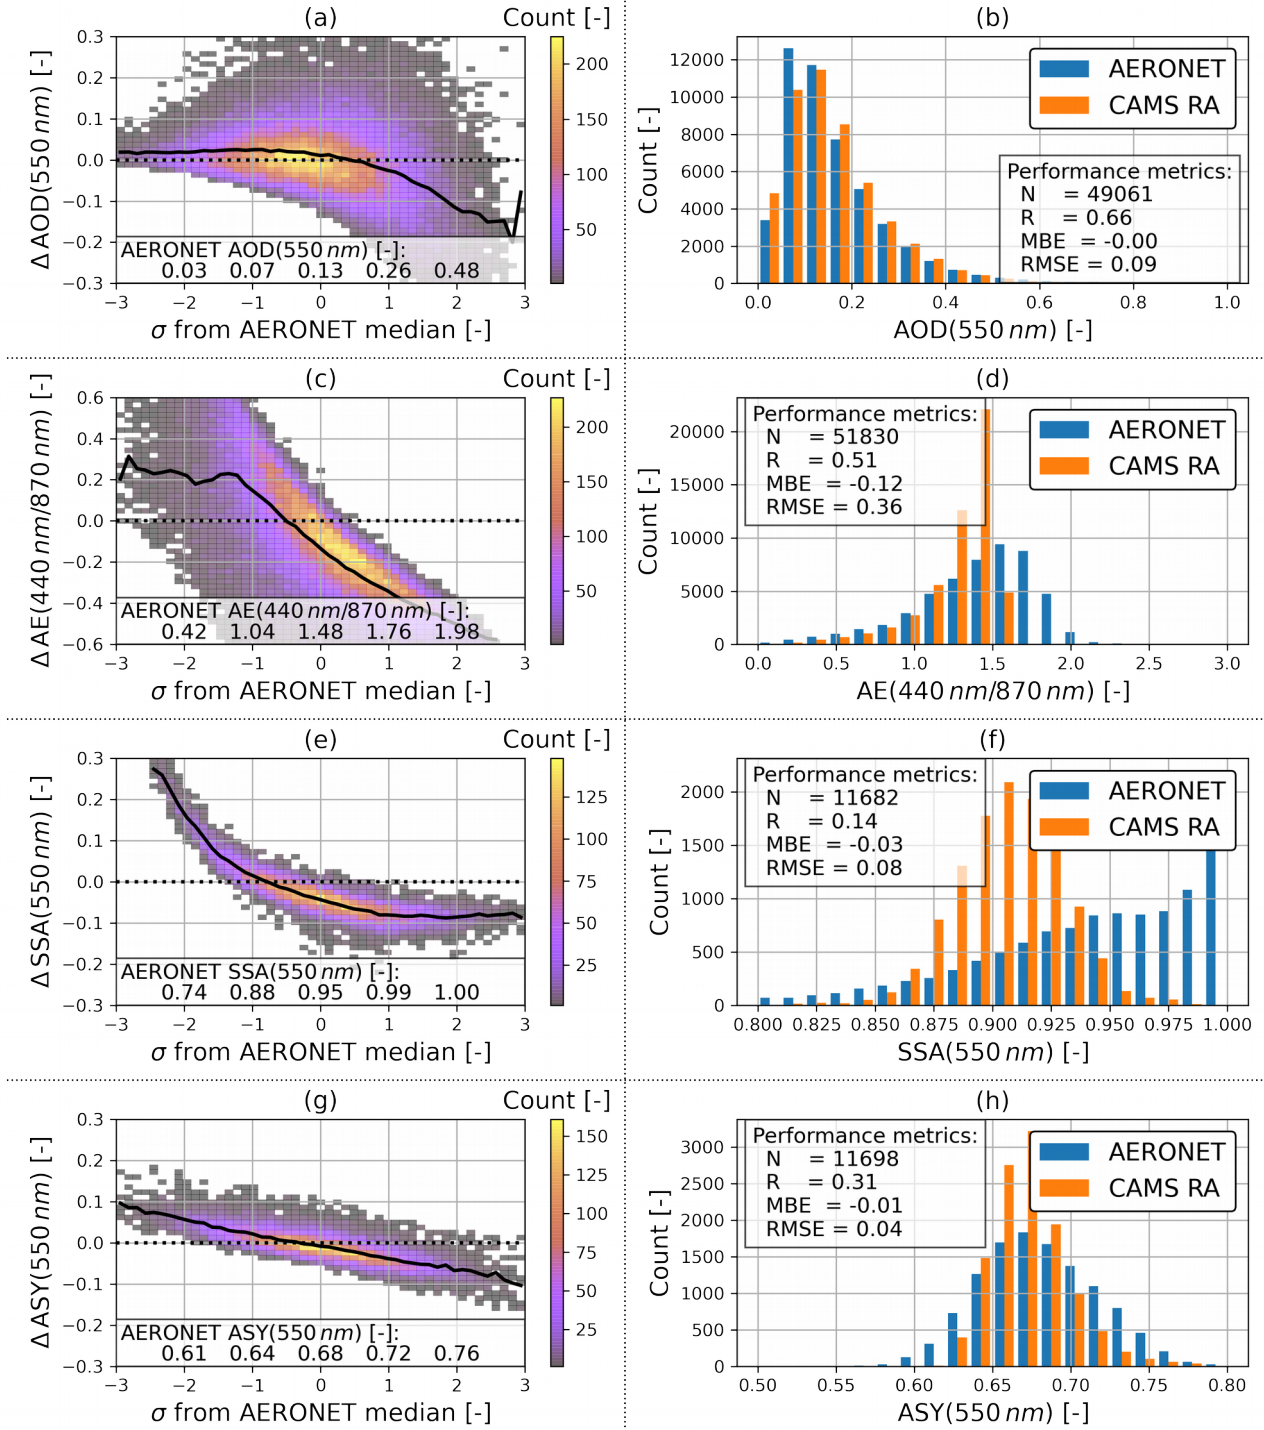

Supplement: Supplementary file [file acp-2021-517-AC2-supplement.pdf]
